# Supplementary material for: Dual-FRET imaging of IP3 and Ca2+ revealed Ca2+-induced IP3 production maintains long lasting Ca2+ oscillations in fertilized mouse eggs
Source: PubMed Central journal article supplement (PMC6423007; doi:10.1038/s41598-019-40931-w), 2019-03-18
Supplement: 41598_2019_40931_MOESM1_ESM.pdf [file 41598_2019_40931_MOESM1_ESM.pdf]

# Dual-FRET imaging of IP<sub>3</sub> and Ca<sup>2+</sup> revealed Ca<sup>2+</sup>-induced IP<sub>3</sub> production maintains long lasting Ca<sup>2+</sup> oscillations in fertilized mouse eggs

Toru Matsu-ura<sup>1</sup>, Hideki Shirakawa<sup>2</sup>, Kenichi G.N. Suzuki<sup>3</sup>, Akitoshi Miyamoto<sup>4,5</sup>, Kotomi Sugiura<sup>6</sup>, Takayuki Michikawa<sup>7</sup>, Akihiro Kusumi<sup>8</sup>, and Katsuhiko Mikoshiba<sup>4\*</sup>

## Affiliation:

1. Department of Stem Cell Pathology, Kansai Medical University, 2-5-1 Shin-machi, Hirakata, Osaka, 573-1010, Japan.
2. Department of Applied Physics and Chemistry, The University of Electro-Communications, Tokyo 182-8585, Japan
3. Center for Highly Advanced Integration of Nano and Life Sciences (G-CHAIN), Gifu University, 1-1 Yanagido, Gifu 501-1193, Japan
4. Laboratory for Developmental Neurobiology, Center for Brain Science, RIKEN, 2-1 Hirosawa, Wako, Saitama 351-0198, Japan
5. Laboratory of Single-Molecule Cell Biology, Kyoto University Graduate School of Biostudies, Konoe-cho, Sakyo-ku, Kyoto 606-8501, Japan
6. Division of Mucosal Vaccines, International Research and Development Center for Mucosal Vaccine, The Institute of Medical Science, University of Tokyo, 4-6-1 Shirokanedai, Minato-ku, Tokyo 108-8639, Japan
7. Laboratory for Biotechnological Optics Research, Center for Advanced Photonics, RIKEN, 2-1 Hirosawa, Wako, Saitama 351-0198, Japan
8. Okinawa Institute of Science and Technology Graduate University, 1919-1 Tancha, Onna, Okinawa, 904-0412, Japan

**#Corresponding to:** Katsuhiko Mikoshiba

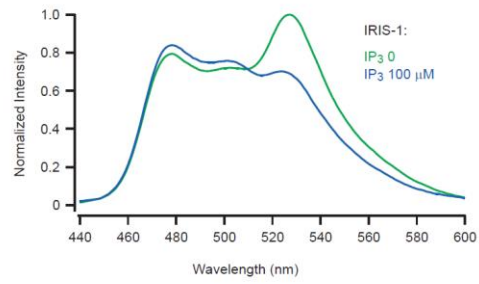

**Supplementary Figure 1. Emission spectra of IRIS-1.** Spectrum measurements of purified IRIS-1 were obtained with (blue line) and without (green line) addition of IP<sub>3</sub>.

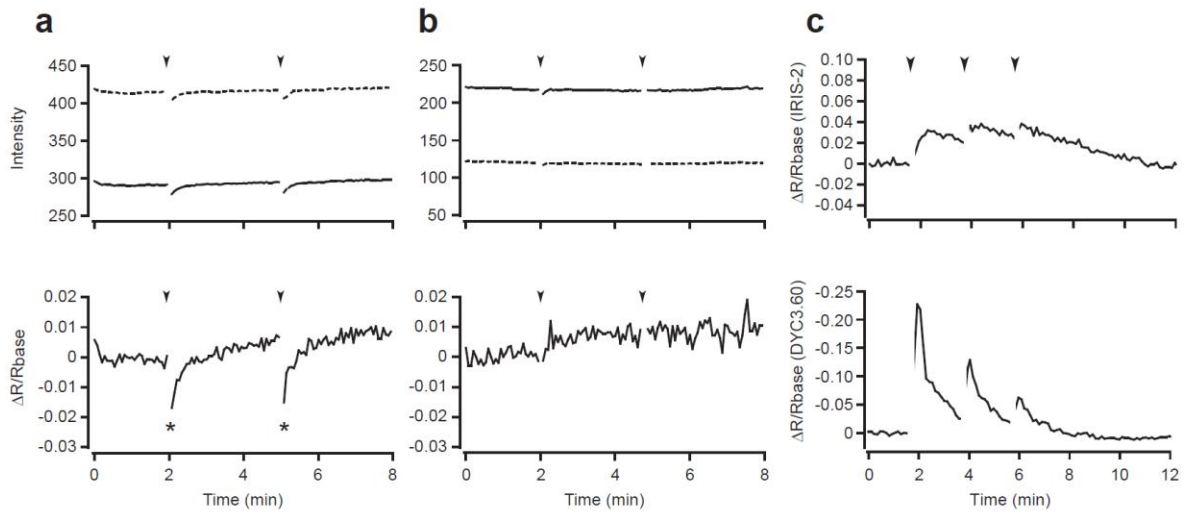

**Supplementary Figure 2. Uncaged-IP<sub>3</sub> was detected by IRIS-2<sub>TMR</sub> expressed in HeLa cells.** (a and b) The effect of UV on the fluorescence of IRIS-1 (a) and IRIS-2<sub>TMR</sub> (b). Arrow heads indicate the timing of UV irradiations. Upper panels show fluorescent signals of FRET donors (continuous lines; ECFP and EGFP in a and b, respectively) and acceptors (broken lines; Venus and TMR in a and b, respectively) in HeLa cells. Lower panels show FRET ratio of IRIS-1 (a) and IRIS-2 (b). (c) IRIS-2<sub>TMR</sub> detected UV-uncaged IP<sub>3</sub> which induce Ca<sup>2+</sup> release from IP<sub>3</sub>R. Fluorescent ratio of IRIS-2<sub>TMR</sub> (upper panel) and DY3.60 (lower panel) are plotted.

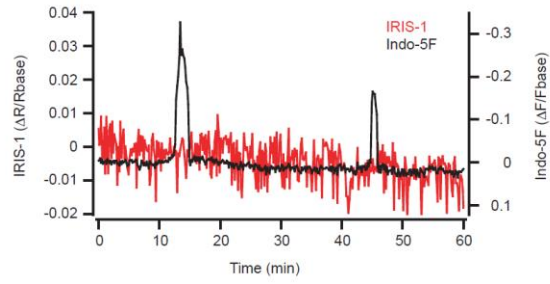

**Supplementary Figure 3. Fluorescent ratio changes of IRIS-1 during fertilization in mouse eggs.** Signals of IRIS-1 are plotted with red lines. Fertilization induced  $\text{Ca}^{2+}$  spikes were detected by Indo-5F (black lines). Sperm was added at the time of zero. Fluorescent images were acquired each 4 sec.

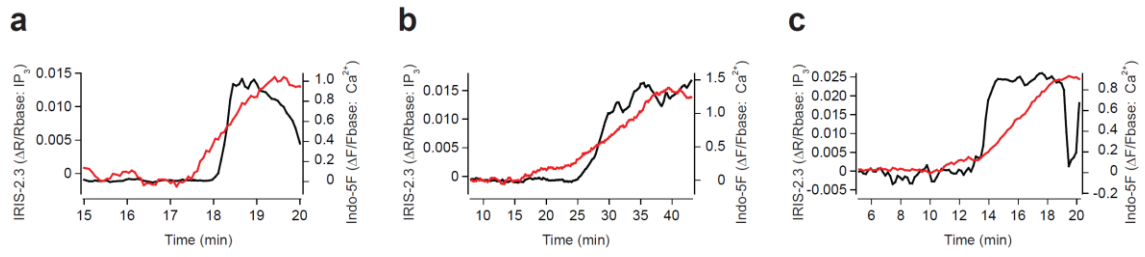

**Supplementary Figure 4. [IP<sub>3</sub>] and [Ca<sup>2+</sup>] traces obtained with Indo-5F and IRIS-2.3<sub>TMR</sub> at the onset of first Ca<sup>2+</sup> spike.** (a-c) Three independent imaging experimental results are shown. [IP<sub>3</sub>] (red lines) and [Ca<sup>2+</sup>] traces (black lines) were obtained with IRIS-2.3<sub>TMR</sub> and DY3.60, respectively.

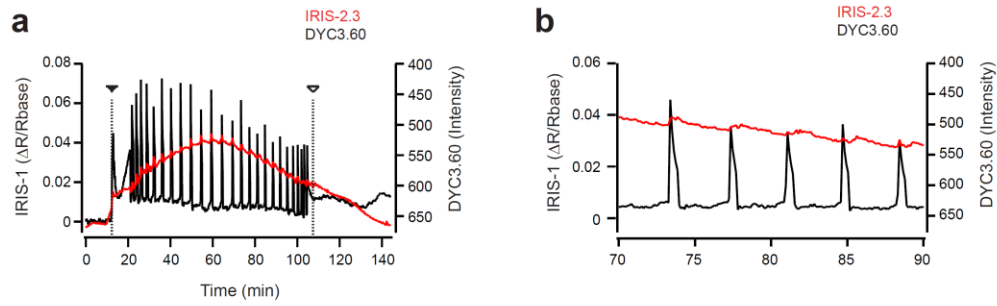

**Supplementary Figure 5. Dual FRET imaging of whole  $\text{Ca}^{2+}$  oscillations at fertilization.**

(a) Emission changes of DY3.60 (black line) and ratio changes of IRIS-2.3<sub>TMR</sub> (red line) are shown. Initiation of the first  $\text{Ca}^{2+}$  spike and the termination of  $\text{Ca}^{2+}$  oscillations were marked with dashed line with closed and open triangles, respectively. Sperm was added at time zero.

(b) The enlarged graph of a shows delays in  $[\text{IP}_3]$  rises.
